1 **Cannabis-associated symptom profiles in patients with first episode**  
2 **psychosis and population controls**

3

4 *Diego Quattrone, MD<sup>1,2,†</sup>; Laura Ferraro, PhD<sup>3</sup>; Giada Tripoli, MsC<sup>4</sup>; Erika La*  
5 *Cascia, PhD<sup>3</sup>; Harriet Quigley, MD<sup>4</sup>; EU-GEI group<sup>‡</sup>; Charlotte Gayer-Anderson,*  
6 *PhD<sup>5</sup>; Peter B. Jones, MD, PhD<sup>6,7</sup>; James B. Kirkbride, PhD<sup>8</sup>, Daniele La Barbera,*  
7 *MD<sup>3</sup>; Ilaria Tarricone, MD, PhD<sup>9</sup>; Michael T. Lynskey, PhD<sup>10</sup>; Tom P. Freeman,*  
8 *PhD<sup>10,11</sup>; Pak C. Sham, MD, PhD<sup>12,13</sup>; Alaistar Cardno, PhD<sup>14</sup>; Evangelos Vassos,*  
9 *MD, PhD<sup>1</sup>; Jim van Os<sup>15,16</sup>; Craig Morgan<sup>5</sup>; Ulrich Reininghaus, PhD<sup>5,16,17</sup>; Cathryn*  
10 *M. Lewis<sup>1</sup>; Robin M. Murray, MD, FRS<sup>2,4</sup> and Marta Di Forti, MD, PhD<sup>1,2</sup>*

11

12 <sup>1</sup> Social, Genetic and Developmental Psychiatry Centre, Institute of Psychiatry,  
13 Psychology and Neuroscience, King's College London, London, United Kingdom, SE5  
14 8AF

15 <sup>2</sup> National Institute for Health Research (NIHR) Maudsley Biomedical Research  
16 Centre, South London and Maudsley NHS Foundation Trust, King's College London,  
17 London, UK

18 <sup>3</sup> Department of Experimental Biomedicine and Clinical Neuroscience, University of  
19 Palermo, Via G. La Loggia 1, 90129 Palermo, Italy

20 <sup>4</sup> Department of Psychosis Studies, Institute of Psychiatry, Psychology and  
21 Neuroscience, King's College London, De Crespigny Park, Denmark Hill, London,  
22 United Kingdom SE5 8AF

23 <sup>5</sup> Department of Health Service and Population Research, Institute of Psychiatry,  
24 Psychology and Neuroscience, King's College London, De Crespigny Park, Denmark  
25 Hill, London, United Kingdom, SE5 8AF

26 <sup>6</sup> Department of Psychiatry, University of Cambridge, Herchel Smith Building for  
27 Brain & Mind Sciences, Forvie Site, Robinson Way, Cambridge, CB2 0SZ, United  
28 Kingdom

29 <sup>7</sup> CAMEO Early Intervention Service, Cambridgeshire & Peterborough NHS  
30 Foundation Trust, Cambridge, CB21 5EF, UK

31 <sup>8</sup> Psylife Group, Division of Psychiatry, University College London, 6th Floor, Maple  
32 House, 149 Tottenham Court Road, London, W1T 7NF

33 <sup>9</sup> Department of Medical and Surgical Science, Psychiatry Unit, Alma Mater  
34 Studiorum Università di Bologna, Viale Pepoli 5, 40126 Bologna, Italy

35 <sup>10</sup> National Addiction Centre, Institute of Psychiatry, Psychology & Neuroscience,  
36 King's College London, 4 Windsor Walk, London, SE5 8BB, UK  
37 <sup>11</sup> Department of Psychology, University of Bath, 10 West, Bath, BA2 7AY, UK  
38 <sup>12</sup> Department of Psychiatry, the University of Hong Kong, Hong Kong, China;  
39 <sup>13</sup> Centre for Genomic Sciences, Li KaShing Faculty of Medicine, The University of  
40 Hong Kong, Hong Kong, China  
41 <sup>14</sup> Academic Unit of Psychiatry and Behavioural Sciences, University of Leeds, Leeds,  
42 United Kingdom  
43 <sup>15</sup> Brain Centre Rudolf Magnus, Utrecht University Medical Centre, Utrecht, The  
44 Netherlands  
45 <sup>16</sup> Department of Psychiatry and Neuropsychology, School for Mental Health and  
46 Neuroscience, South Limburg Mental Health Research and Teaching Network,  
47 Maastricht University Medical Centre, P.O. Box 616, 6200 MD Maastricht, The  
48 Netherlands  
49 <sup>17</sup> Central Institute of Mental Health, Medical Faculty Mannheim, University of  
50 Heidelberg, Mannheim, Germany

51

52 **Word count:**

53

54 **Abstract: 244 words**

55 **Main text: 3,335 words**

56

57 †Correspondence to: Dr Diego Quattrone, [diego.quattrone@kcl.ac.uk](mailto:diego.quattrone@kcl.ac.uk), Social, Genetic  
58 and Developmental Psychiatry Centre, Institute of Psychiatry, Psychology and  
59 Neuroscience, King's College London, London, United Kingdom, SE5 8AF

60 ‡For a full list of the EU-GEI group authors, see Acknowledgments

61

62

63

64 **Abstract**

65 **Objective:** The evidence is mixed on whether cannabis use is associated with a  
66 particular symptomatology in first episode psychosis (FEP) patients.

67 The authors set out to investigate a) patterns of association between cannabis use  
68 and transdiagnostic symptom dimensions; b) whether the extent of use of cannabis  
69 contributes to the variation in clinical and subclinical symptom profiles.

70 **Method:** The authors analysed data from 901 patients and 1235 controls recruited  
71 across six countries, as part of the European Network of National Schizophrenia

72 Networks Studying Gene-Environment Interactions (EU-GEI) study. Item response  
73 modelling was used to estimate two bifactor models, which included general and  
74 specific dimensions of psychotic symptoms in patients and psychotic experiences in  
75 controls. The associations between these dimensions and cannabis use was evaluated  
76 using linear mixed effects models analyses.

77 **Results:** In patients, there was a linear relationship between the positive symptom  
78 dimension and the extent of lifetime exposure to cannabis, with daily users of high  
79 potency cannabis having the highest score ( $B=0.35$ ; 95%CI 0.14 to 0.56). Moreover,  
80 negative symptoms were more common among patients who never used cannabis  
81 compared with those with any pattern of use ( $B=-0.27$ ; 95%CI -0.42 to -0.12).

82 In controls, psychotic experiences were associated with current use of cannabis but  
83 not with the extent of lifetime use.

84 Neither patients nor controls presented differences in the depressive dimension  
85 related to cannabis use.

86 **Conclusions:** The extent of use of cannabis explains part of the heterogeneous  
87 distribution of positive and negative symptoms of FEP patients.

88

89

90

## 91 **Introduction**

92 There is compelling evidence to suggest an association between cannabis use and  
93 psychotic disorders, with highest risk among those using high potency cannabis on a  
94 daily basis (1). However, how cannabis use affects the symptoms psychotic patients  
95 present with remains unclear.

96 The existence of psychotic symptomatology particularly associated with cannabis use  
97 has been historically described in several case series (2-5). Nevertheless, case and  
98 cohort studies have found mixed results as to whether (6-11) or not (12-15) psychotic  
99 patients using cannabis present with more positive symptoms than those not using  
100 cannabis. Moreover, there is limited and mixed evidence of any relationship between  
101 cannabis use and negative symptoms in psychosis. Some reports suggest fewer  
102 negative symptoms in psychotic patients that use of cannabis (16, 17), which is  
103 consistent with having enough social skills to obtain the substance. However, this  
104 association has not been confirmed in other studies (7, 8) and others even reported a  
105 positive association (9).

106 These inconsistencies might be explained by differences in study design and  
107 methods. For example, only a few findings were based on first episode psychosis  
108 (FEP) patients (7, 8, 10), which allows one to reduce selection and recall bias, set a  
109 common time point and minimise the confounding effect of antipsychotic drugs on  
110 symptoms. In addition, a metaanalysis of longitudinal studies concluded that most  
111 results lacked sufficient power to detect an effect of cannabis on symptoms, or  
112 inadequately controlled for potential confounders (18). Furthermore, although a few  
113 studies have information on frequency of use, all failed to obtain detailed  
114 information on the lifetime pattern of cannabis use, especially on the type and  
115 strength of cannabis used. Of note, potent cannabis varieties, with high  
116 concentrations of Delta-9-Tetrahydrocannabinol ( $\Delta$ 9-THC), have been associated  
117 with the most harm to mental health (19, 20) and, in recent years, they have become  
118 more available worldwide (21, 22). Finally, although the use of a symptom-based  
119 approach would be an essential requirement for understanding to what extent  
120 environmental factors influence the clinical heterogeneity of psychosis (23), no  
121 studies have investigated how cannabis use is related to different psychotic symptom  
122 dimensions.

123 On the other hand, in the general population there are consistent findings regarding  
124 the association between cannabis use and subthreshold psychotic symptoms (24).  
125 However, most studies presented bias in the selection of non-psychotic population,  
126 and all had limited geographical coverage (24).

127 In this study, we set out to clarify the association between detailed patterns of  
128 cannabis use and transdiagnostic symptom dimensions in a large multinational FEP  
129 sample.

130 In addition, we examine the association between detailed patterns of cannabis use  
131 and subclinical symptom dimensions in a large sample of controls, that are  
132 representative of the population at risk in each catchment area.

133 Specifically, we sought to test the hypotheses that: (1) positive psychotic symptoms  
134 are more common among FEP patients with more frequent lifetime use of cannabis  
135 and greater exposure to use of high potency varieties; (2) positive psychotic  
136 experiences are more common in population controls with a recent use of cannabis;  
137 (3) negative symptoms are more common among those patients who have never used  
138 cannabis.

139

140

141

142

## 143 **Methods**

### 144 **Study design and participants**

145 This analysis is based on data from the incidence and case-control study work  
146 package of the EUropean network of national schizophrenia networks studying  
147 Gene-Environment Interactions (EU-GEI).

148 FEP individuals were identified between 2010 and 2015 across six countries to  
149 examine incidence rates of schizophrenia and other psychotic disorders (25), and  
150 symptomatology at psychosis onset (23). For examining risk factors, we sought to  
151 perform an extensive assessment on approximately 1,000 FEP patients and 1,000  
152 population-based controls during the same time period.

153 Patients were included in the case-control study if they met the following criteria  
154 during the recruitment period: (a) aged between 18 and 64 years; (b) presentation  
155 with a clinical diagnosis for an untreated FEP, even if longstanding [International  
156 Statistical Classification of Diseases and Related Health Problems, Tenth Revision  
157 (ICD-10) codes F20-F33]; (c) resident within the catchment area. Exclusion criteria  
158 were: (a) previous contact with psychiatric services for psychosis; (b) psychotic  
159 symptoms with any evidence of organic causation; and (c) transient psychotic  
160 symptoms resulting from acute intoxication (ICD-10: F1x.5).

161 The recruitment of controls followed a mixture of random and quota sampling  
162 methods, in order to achieve the best possible representativeness in age, sex, and  
163 ethnicity of the population living in each catchment area. The identification process  
164 varied by site and was based on locally available sampling frames, including mostly  
165 the use of lists of all postal addresses and general practitioners' lists from randomly  
166 selected surgeries. When these resources were not fully available, internet and  
167 newspapers advertising were used to fill quotas. Exclusion criteria for controls were:  
168 (a) diagnosis of a psychotic disorder; (b) ever having been treated for psychotic  
169 symptoms.

170 We analysed data from eleven catchment areas, including urban and less urban  
171 populations (i.e. Southeast London, Cambridgeshire and Peterborough (England);  
172 central Amsterdam, Gouda and Voorhout (the Netherlands); Bologna municipality,  
173 city of Palermo (Italy); Paris [Val-de-Marne], Puy-de-Dôme (France); Madrid

174 [Vallecas], Barcelona (Spain); and Ribeirão Preto (Brazil) (23). Further information  
175 on the case-control sample and the recruitment strategies is included in the  
176 supplementary material.

177

## 178 **Measures**

179 Data on age, sex, and ethnicity was collected using a modified version of the Medical  
180 Research Council Sociodemographic Schedule (26). The OPERational CRITeria  
181 (OPCRIT) system (27) was used by centrally trained investigators, whose reliability  
182 was assessed before and throughout the study ( $k=0.7$ ), to assess psychopathology  
183 and generate research-based diagnoses based on different diagnostic classification  
184 systems. The Community Assessment of Psychic Experiences (CAPE) (28) was  
185 administered to controls to self-report their psychotic experiences. The reliability of  
186 the CAPE is good for all the languages spoken in the countries forming part of the  
187 EU-GEI study (<http://cape42.homestead.com>).

188 A modified version of the Cannabis Experience Questionnaire (CEQ<sub>EU-GEI</sub>) (29) was  
189 used to collect extensive information on the patterns of use of cannabis and other  
190 drugs. Based on our EU-GEI paper on cannabis (30) we included six measures of  
191 cannabis use (Supplementary Table S2), along with a variable measuring specific  
192 patterns of cannabis exposure by combining the frequency of use with the potency of  
193 cannabis. As illustrated in the supplementary material, the cannabis potency variable  
194 was based on the data published in the EMCDDA 2016 (31, 32).

195 We selected confounders based on their possible association with cannabis use  
196 and/or symptom dimensions. These included: sex; age; ethnicity; use of stimulants,  
197 hallucinogens, ketamine, cocaine, crack, and novel psychoactive substances (current  
198 use no=0; yes=1); current use of cigarettes (no use or smoking less than 10 cigarettes  
199 per day=0; smoking 10 cigarettes or more per day=1), and current use of alcohol  
200 (drinking less than 10 units per week= 0; drinking more than 10 alcohol units per  
201 week=1).

## 202 **Statistical analysis**

### 203 **Dimensions of psychotic symptoms in patients and psychotic experiences** 204 **in controls**

205 Data from OPCRIT and CAPE were analysed using multidimensional item response  
206 modelling in *Mplus*, version 7.4 (33), to estimate two bifactor models, based on the  
207 associations among observer ratings of psychotic symptoms in patients and self-

208 ratings of psychotic experiences in controls. This methodology is described in full in  
209 our EU-GEI paper on symptom dimensions in FEP patients (30), and it was likewise  
210 applied to psychotic experiences in population controls. Briefly, CAPE items were  
211 dichotomized as 0 'absent' or 1 'present'. In order to ensure sufficient covariance  
212 coverage for item response modelling, we used items with a valid frequency of  
213 'present'  $\geq 10\%$  in our sample, and we excluded those items with low correlation  
214 values ( $< .3$ ) based on the examination of the item correlation matrix. Data used in  
215 the analysis contained missing values, which we assumed to be missing at random,  
216 allowing for the maximum likelihood estimator to provide unbiased estimates. As in  
217 the previous analysis in patients, the bifactor solution was compared with other  
218 solutions (i.e., unidimensional, multidimensional, and hierarchical models) using  
219 Log-Likelihood (LL), Akaike Information Criterion (AIC), Bayesian Information  
220 Criterion (BIC), and Sample-size Adjusted BIC (SABIC) as model fit statistics. Path  
221 diagrams that illustrate these models are presented in Supplementary Figure S1.  
222 Reliability and strength indices such as McDonald's omega ( $\omega$ ) (34), omega  
223 hierarchical ( $\omega_H$ ) (34), and index H (35), were computed to determine: 1) the  
224 proportion of common variance accounted by general and specific symptom  
225 dimensions; 2) the proportion of reliable variance accounted by the general  
226 dimension not unduly affected by the specific dimensions; 3) the proportion of  
227 reliable variance accounted for by each specific dimension not unduly affected by the  
228 general and all the other specific dimensions; 4) the overall reliability and  
229 replicability of the bifactor construct of psychosis-like experiences. Finally, we  
230 generated factor scores for one general psychotic experience dimension and three  
231 specific dimensions of positive, negative, and depressive psychotic experiences.  
232 For patients, we used the previously generated factor scores for one general  
233 psychosis dimension and five specific dimensions of positive, negative, disorganised,  
234 manic, and depressive symptoms (23).

235

### 236 **Symptom dimensions and cannabis use**

237 We evaluated the relationship between psychotic symptom dimensions in patients,  
238 or psychotic experience dimensions in controls, and cannabis use using linear mixed  
239 effects models in STATA 14. We specifically modelled symptom dimension scores as  
240 a function of each of the six measures of cannabis use. We then evaluated the  
241 combined effect of frequency of use and potency of cannabis. To account for the non-

242 independence of symptom profiles of subjects assessed within the same country (for  
243 example, due to cultural similarities), and for the potential within-site correlation  
244 (for example, due to context factors), we fitted a three-level mixed model, where the  
245 random effect encompassed a double level of random intercepts: one due to the  
246 countries, and another due to the sites within the countries.

247 We conducted a sensitivity analysis to estimate an additional bifactor model based  
248 on the distress elicited by the psychotic experiences. This aimed to rule out the  
249 possibility in controls that 1) positive psychotic experiences were no distressing if  
250 associated to cannabis use, and 2) self-rating of positive psychotic experiences was  
251 influenced by contextual or cultural factors. We therefore confirmed our findings  
252 further adjusting the linear mixed effects models for the distress factor scores.

253

## 254 **Results**

### 255 **Sample characteristics**

256 We analysed data from 901 FEP patients and 1,235 controls. Main Socio-  
257 demographic characteristics and history of substance misuse of patients and controls  
258 are presented in Supplementary Table S1. Supplementary Tables S3.1 and S3.2 show  
259 the sample prevalence of psychotic experiences in controls and of psychotic  
260 symptoms in patients.

261

### 262 **Bifactor model of psychotic experiences in controls**

263 Table 1 shows that, similar to our previous analysis of the OPCRIT items (23), the  
264 bifactor model provided the best fit for the CAPE items, as illustrated by AIC, BIC  
265 and SABIC substantially lower compared with competing models. This solution  
266 explained 60% of the unique variance. In addition, Figure 1 shows that, within the  
267 bifactor model, the explained variance was due to individual differences mostly on  
268 the general psychotic experience dimension. This is illustrated by the relative omega  
269 coefficient, which, for example, showed that 85% of the reliable variance was due to  
270 the general dimension when partitioning out the variability in scores due to the  
271 specific dimensions. Moreover, factor loadings of moderate to high magnitude were  
272 observed for most items on the general psychotic experience dimension, whereas  
273 factor loadings of a smaller magnitude were observed for the specific dimensions  
274 (Figure 1). Consistently, the index H, which is a measure of the construct reliability  
275 and replicability across studies (35), was very high for the general dimension (0.92),



276 moderate for positive (0.78) and negative (0.71) dimensions and lower for the  
 277 depressive dimension (0.41).

278

279 **Table 1.** Model fit statistics of unidimensional, multidimensional, bifactor, second-order models for  
 280 psychotic symptoms and psychotic experiences

281

| CAPE (CONTROLS)                                                                                           |                                              |              |              |              |
|-----------------------------------------------------------------------------------------------------------|----------------------------------------------|--------------|--------------|--------------|
|                                                                                                           | Full information fit statistics <sup>a</sup> |              |              |              |
|                                                                                                           | LL                                           | AIC          | BIC          | SABIC        |
| A - Unidimensional Model                                                                                  | -23638                                       | 47397        | 47715        | 47524        |
| B - Multidimensional Model (five uncorrelated factors)                                                    | -23844                                       | 47808        | 48126        | 47936        |
| C - Multidimensional Model (five correlated factors)                                                      | -23341                                       | 46808        | 47142        | 46942        |
| <b>D - Bifactor Model (one general factor and five specific uncorrelated factors)</b>                     | <b>-23139</b>                                | <b>46458</b> | <b>46935</b> | <b>46649</b> |
| E - Hierarchical Model (five first-order specific correlated factors and one second order general factor) | -23341                                       | 46807        | 47135        | 46938        |
| OPCRIT (PATIENTS)                                                                                         |                                              |              |              |              |
|                                                                                                           | Full information fit statistics <sup>a</sup> |              |              |              |
|                                                                                                           | LL                                           | AIC          | BIC          | SABIC        |
| A - Unidimensional Model                                                                                  | -29965                                       | 60126        | 60618        | 60306        |
| B - Multidimensional Model (five uncorrelated factors)                                                    | -28070                                       | 56335        | 56826        | 56515        |
| C - Multidimensional Model (five correlated factors)                                                      | -27894                                       | 56004        | 56546        | 56202        |
| <b>D - Bifactor Model (one general factor and five specific uncorrelated factors)</b>                     | <b>-27597</b>                                | <b>55489</b> | <b>56226</b> | <b>55759</b> |
| E - Hierarchical Model (five first-order specific correlated factors and one second order general factor) | -27995                                       | 56197        | 56713        | 56386        |

282

283 LL, log-likelihood; AIC, Akaike Information Criterion; BIC, Bayesian Information Criterion; SABIC

284 Sample-size Adjusted Bayesian Information Criterion

285 A difference of 10 in AIC, BIC and SABIC is considered important. Lower values indicate a statistically  
 286 better model fit (best values across models are indicated in bold).

287

288 **Figure 1.** Bifactor model of psychotic experiences in controls

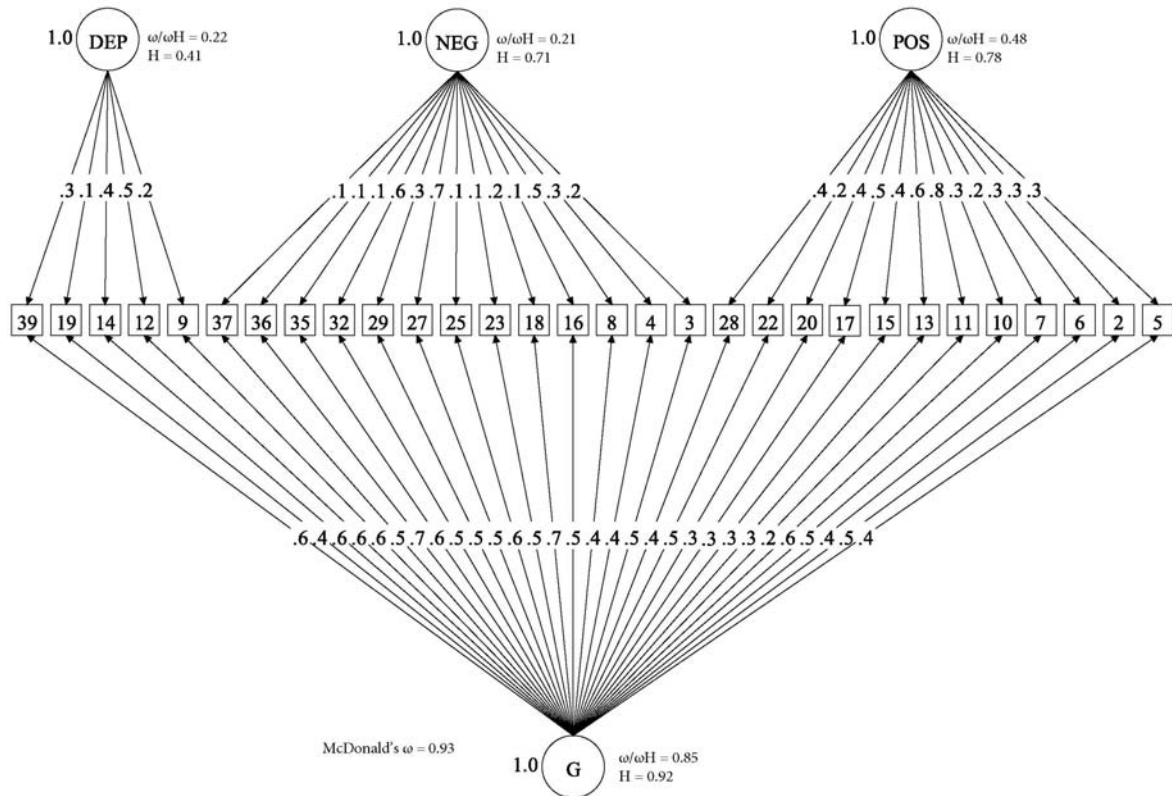

289  
290

291 (□) Observed variables (No. of CAPE items); (○) Unobserved variables (latent factors); (→)  
292 standardized item loading estimation onto latent factors; G, general psychosis-like factor; Specific  
293 psychotic experiences factors: DEP, Depression; NEG, Negative; POS, Positive. Reliability and  
294 strength estimates: H=construct reliability index;  $\omega$ = McDonald omega;  $\omega_H$ =hierarchical omega;  
295  $\omega/\omega_H$ = Relative omega.

296 Explanatory note: McDonald's  $\omega$  is an estimate of the proportion of the common variance accounted  
297 by general and specific symptom dimensions.(34)

298 Relative omega ( $\omega/\omega_h$ ) is the amount of reliable variance explained in the observed scores attributable  
299 to a) the general factor independently from the specific symptom dimensions, and 2) each specific  
300 symptom dimension independently from the general factor.

301  $H$  is an index of the quality of the measurement model based on the set of CAPE items for each  
302 dimension.(35) Indices can range from 0 to 1, with values closer to 1 indicating a better construct  
303 reliability and replicability across studies.

304  
305

### 306 **Symptom dimensions in patients by lifetime cannabis use, current** 307 **cannabis use, age at first use, and money spent on cannabis**

308 Models' results are presented in Table 2.1 which shows that:

309 1) There were no differences in the distribution of positive symptoms according to  
310 ever use of cannabis or early age at first use ( $= < 15$  years old). However, positive  
311 symptoms were more common among patients who currently used cannabis  
312 ( $B=0.22$ ; 95%CI 0.04 to 0.4;  $p=0.016$ ) and who spent more than 20 euros per week  
313 on cannabis ( $B=0.35$ ; 95%CI 0.14 to 0.55;  $p=0.001$ ).

314 2) Fewer negative symptoms were observed among those patients who used cannabis  
 315 at least once compared with those who never tried (B=-0.27; 95%CI -0.42 to -0.12;  
 316 p<0.001). Early age at first use and current use of cannabis was not associated with  
 317 negative symptomatology.

318 3) Manic symptoms were more frequent among patients who had either ever use  
 319 (B=0.31; 95%CI 0.14 to 0.47; p<0.001) or current use of cannabis (B=0.19; 95%CI  
 320 0.01 to 0.36; p=0.035).

321 4) There were no differences in the distribution of the scores on the depressive and  
 322 general psychosis dimensions according to any measure of cannabis use.

323

324 **Table 2.1** Symptom dimensions in FEP patients by measures of cannabis use<sup>a</sup>

| Model                             | Ever used cannabis<br>B (95% CI)    | Current use of cannabis<br>B (95% CI) | Age at first use of cannabis<br>B (95% CI) | Money used for cannabis<br>B (95% CI) |
|-----------------------------------|-------------------------------------|---------------------------------------|--------------------------------------------|---------------------------------------|
| Positive symptom dimension        | 0.14<br>(-0.04 to 0.31)             | <b>0.22*</b><br>(0.04 to 0.4)         | 0.08<br>(-0.11 to 0.26)                    | <b>0.35**</b><br>(0.14 to 0.55)       |
| Negative symptom dimension        | <b>-0.27***</b><br>(-0.42 to -0.12) | -0.09<br>(-0.26 to 0.07)              | 0.13<br>(-0.03 to 0.29)                    | 0.03<br>(-0.16 to 0.22)               |
| Depressive symptom dimension      | -0.08<br>(-0.24 to 0.08)            | -0.08<br>(-0.25 to 0.09)              | -0.11<br>(-0.25 to 0.02)                   | -0.11<br>(-0.29 to 0.06)              |
| Disorganization symptom dimension | -0.04<br>(-0.2 to 0.13)             | 0.08<br>(-0.09 to 0.25)               | 0.17<br>(-0.01 to 0.35)                    | <b>0.2*</b><br>(0.01 to 0.39)         |
| Manic symptom dimension           | <b>0.31***</b><br>(0.14 to 0.47)    | <b>0.19*</b><br>(0.01 to 0.36)        | -0.09<br>(-0.25 to 0.07)                   | 0.07<br>(-0.13 to 0.26)               |
| General psychosis factor          | 0.06<br>(-0.07 to 0.19)             | 0.03<br>(-0.1 to 0.17)                | -0.01<br>(-0.12 to 0.15)                   | 0.05<br>(-0.1 to 0.21)                |

325 <sup>a</sup>All models were adjusted for age, sex, ethnicity, use of any other recreational/illicit substances and  
 326 tobacco. Models were random-intercept models that included two random effects to allow  
 327 symptomatology to vary across countries and across sites within countries but assumed that  
 328 individual-level exposure to cannabis had a fixed effect across the entire sample.

329 Significance: \* p < 0.05, \*\* p < 0.01, \*\*\* p < 0.001

330

331 **Psychotic experiences' dimensions in population controls by lifetime**  
 332 **cannabis use, current cannabis use, age at first use, and money spent on**  
 333 **cannabis**

334 Models' results are presented in Table 2.2, which shows that:

- 335 1) There were no differences in the distribution of positive psychotic experiences  
 336 according to ever use of cannabis or early age at first use (= <15 years old). However,  
 337 positive psychotic experiences were more commonly self-reported by subjects who  
 338 currently used cannabis (B=0.19; 95%CI 0.01 to 0.37; p=0.037) and who spent more  
 339 than 20 euros per week on cannabis (B=0.31; 95%CI 0.01 to 0.6; p=0.044).  
 340 2) There were no differences in the distribution of the depressive and negative  
 341 experiences in population controls according to cannabis use.  
 342 3) The general psychotic experience dimension was associated with current use of  
 343 cannabis (B=0.21; 95%CI 0.04 to 0.41; p=0.03).

344

345 **Table 2.2** Psychotic experience dimensions in controls by cannabis use<sup>a</sup>

| Model                                   | Ever used cannabis<br>B (95% CI) | Current use of cannabis<br>B (95% CI) | Age at first use of cannabis<br>B (95% CI) | Money used for cannabis<br>B (95% CI) |
|-----------------------------------------|----------------------------------|---------------------------------------|--------------------------------------------|---------------------------------------|
| Positive psychotic experience dimension | -0.03<br>(-0.15 to 0.09)         | <b>0.19*</b><br>(0.01 to 0.37)        | 0.13<br>(-0.05 to 0.32)                    | <b>0.31*</b><br>(0.01 to 0.6)         |
| Negative experience dimension           | -0.05<br>(-0.18 to 0.08)         | -0.02<br>(-0.21 to 0.18)              | -0.06<br>(-0.25 to 0.13)                   | -0.29<br>(-0.61 to 0.02)              |
| Depressive experience dimension         | -0.01<br>(-0.13 to 0.11)         | 0.01<br>(-0.19 to 0.20)               | -0.04<br>(-0.15 to 0.22)                   | -0.01<br>(-0.31 to 0.33)              |
| General psychotic experience            | 0.1<br>(-0.02 to 0.22)           | <b>0.21*</b><br>(0.02 to 0.41)        | -0.03<br>(-0.22 to 0.15)                   | 0.16<br>(-0.16 to 0.48)               |

346 <sup>a</sup>All models were adjusted for age, sex, ethnicity, use of any other recreational/illicit substances and  
 347 tobacco. Models were random-intercept models that included two random effects to allow  
 348 symptomatology to vary across countries and across sites within countries but assumed that  
 349 individual-level exposure to cannabis had a fixed effect across the entire sample.

350 Significance: \* p < 0.05, \*\* p < 0.01, \*\*\* p < 0.001

351

352

### 353 **Symptom dimensions by lifetime pattern of cannabis use**

354 Preliminary analysis testing independently the effects of frequency of use and  
 355 potency of cannabis showed that, only in patients, positive symptoms were more  
 356 common in those who used cannabis on a daily basis or exposed to high potency  
 357 varieties (Supplementary Figure S2, Supplementary Table S4.1).

358 Testing the combined 'type-frequency' variable in patients, we found evidence of a  
 359 linear relationship between the positive symptom dimension and the extent of  
 360 exposure to cannabis, with daily users of high potency cannabis showing the highest

361 score ( $B=0.35$ ; 95%CI 0.14 to 0.56;  $p=0.001$ ). Therefore, we introduced a contrast  
362 operator and plot the exposure-response relationship for positive symptoms (Figure  
363 2), by comparing the predictive margins of the adjusted mean of each group against  
364 the grand adjusted mean of all groups. Figure 2 shows that the adjusted mean for  
365 daily users of high potency cannabis was 0.15 units greater than the grand adjusted  
366 mean. Moreover, the adjusted means for the groups who never or rarely used  
367 cannabis were respectively 0.13 or 0.14 units lower than the grand adjusted mean.  
368 A negative relationship between the negative symptom dimension score and patterns  
369 of cannabis use was also observed in patients. Figure 3 shows that patients with  
370 psychosis who never used cannabis had more negative symptoms either compared  
371 with the grand adjusted mean or with any pattern of cannabis use.

372

373 **Figure 2.** Positive symptom dimension in FEP patients by patterns of cannabis use.

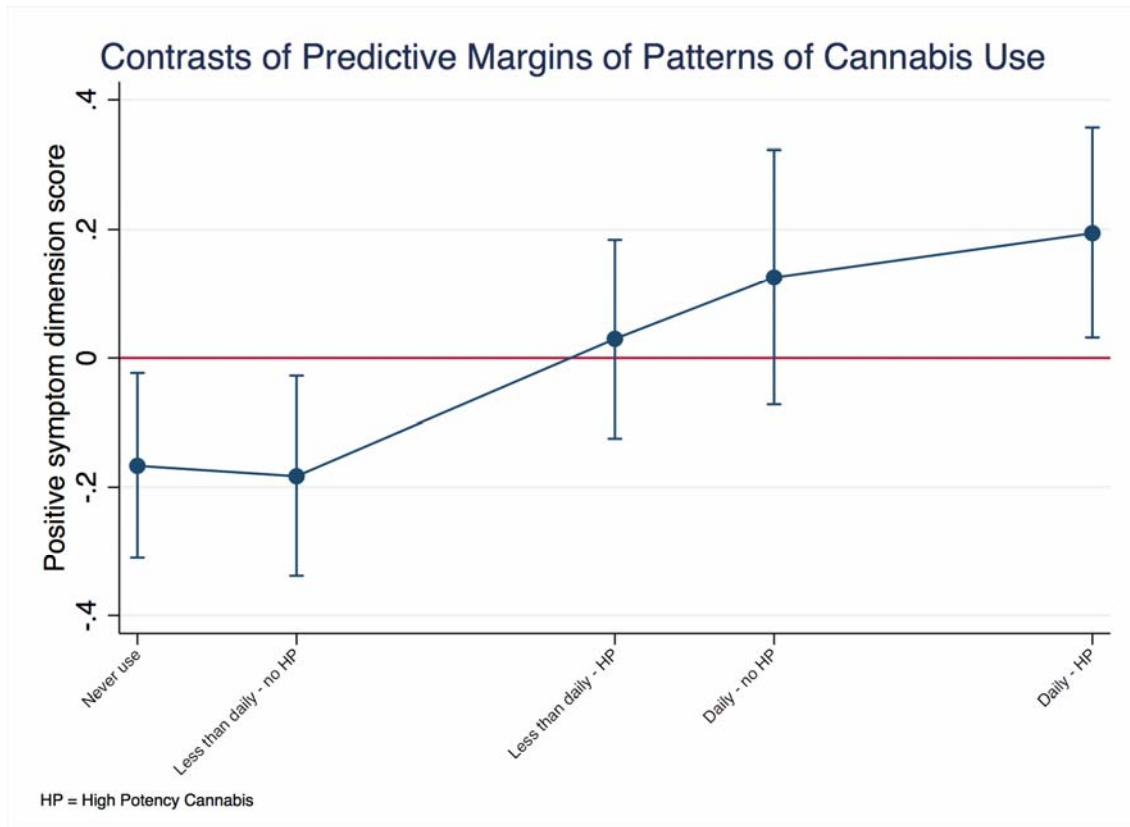

374

375 Figure 2 shows the contrasts of the positive symptom dimension predicted mean of each group against  
376 the predicted grand mean of all groups. Values were adjusted for age, sex, ethnicity, current use of  
377 other recreational and illicit substances (such as stimulants, hallucinogens, cocaine, crack, novel  
378 psychoactive substances) and tobacco. The model was a random intercept model which allowed  
379 symptoms to vary across countries and sites within countries but assumed frequency of use and type  
380 of cannabis had an individual fixed effect. The positive value for the contrast of the daily use of high  
381 potency cannabis indicates more positive symptomatology in this group. On the other hand, negative  
382 values for the contrasts of the first two groups indicates less positive symptomatology when there is

383 less exposure to cannabis. These differences are statistically significant, as indicated by 95%  
384 confidence intervals that do not overlap with zero.

385  
386

387 **Figure 3.** Negative symptom dimension by patterns of cannabis use.

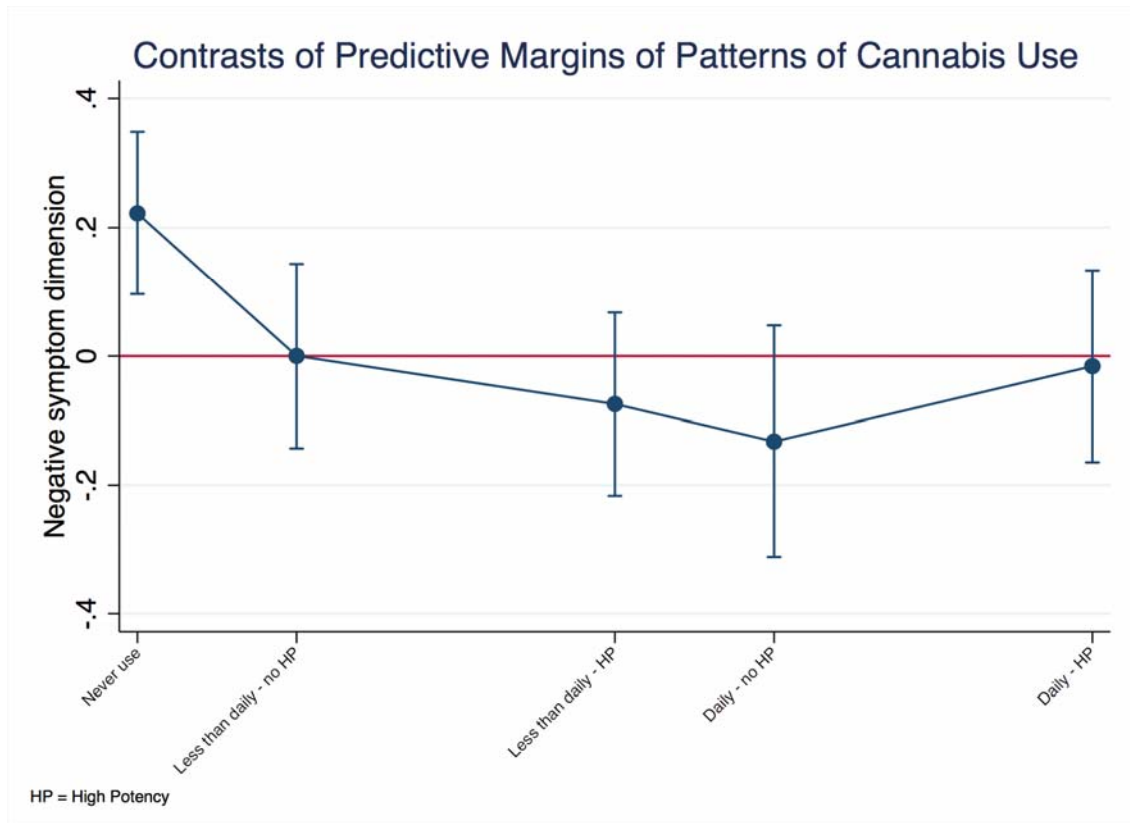

388  
389

390 Figure 3 shows the contrasts of the negative symptom dimension predicted mean of each group  
391 against the grand adjusted predicted mean (represented by the red line). Subjects who had never used  
392 cannabis presented with more negative symptoms compared to the whole sample. Values are adjusted  
393 for age, sex, ethnicity, current use of other recreational and illicit substances and tobacco. The model  
394 was a random intercept model which allowed symptoms to vary across countries and sites within  
395 countries, but it assumed that frequency of use and type of cannabis had an individual fixed effect.

396  
397  
398

399

## 400 **Discussion**

### 401 **Principal findings**

402 This is the first multinational study exploring the dose effect of cannabis use on  
403 dimensions of symptom in FEP patients, and on dimensions of psychotic experiences  
404 in population controls. Our findings indicate that: 1) in patients, a positive

405 correlation exists between the extent of premorbid cannabis use and the score at the  
406 positive symptom dimension, with daily users of high potency cannabis showing the  
407 worst symptomatology at FEP; 2) psychotic experiences in non-clinical populations  
408 is associated with current use of cannabis but is independent of the extent of lifetime  
409 exposure to cannabis; 3) negative symptoms at FEP are more common in patients  
410 who have never tried cannabis; 4) depressive symptoms are independent of any  
411 pattern of use of cannabis.

412

### 413 **Limitations**

414 Our findings must be considered in the context of three main limitations. First,  
415 individual data on patterns of cannabis use are not validated with biological samples.  
416 However, such methods would not allow one to ascertain the extent of cannabis use  
417 over the years (36). Moreover, studies combining self-report and laboratory data  
418 support the reliability of subjects in reporting the type of cannabis they use (37, 38).  
419 Second, we did not take into account the cannabidiol (CBD) contribution to the  
420 potency variable, as official data on its content in the different cannabis varieties  
421 were not available in most study sites. Indeed, CBD might counterbalance  $\Delta 9$ -THC  
422 effects and minimise both psychotic experiences (39) and positive psychotic  
423 symptoms (40). Third, it could be argued that self-report checklists for subclinical  
424 symptoms, such as the CAPE, might yield false positive rates, as the interpretation  
425 and rating of the experiences might be subject to contextual or cultural factors in  
426 individuals without a psychiatric history (41). However, our findings are confirmed  
427 even after adjusting the analyses for the distress elicited by psychotic experiences,  
428 which is less subject to misinterpretation (42).

429

### 430 **Comparison with previous research**

431 We extend previous research on cannabis and psychotic symptoms to a multinational  
432 sample confirming the association between cannabis use and positive symptoms of  
433 FEP (8, 9). Our results are in line with Schoeler et al. (2016), who carefully  
434 scrutinised the literature on the effect of continuation of cannabis use after FEP,  
435 concluding that this would be associated with a more severe positive  
436 symptomatology (43). That said, any comparison with previous research is limited by  
437 the lack of information on frequency and potency in all the previous studies along  
438 with subjects' exposure to more potent varieties of cannabis over recent years (22).

439 In this respect, we firstly provide some evidence that cannabis affects positive  
440 symptoms in a dose response manner, further supporting the converging  
441 epidemiological and experimental evidence that the use of cannabis with high  
442 content of  $\Delta 9$ -THC has a more detrimental effect than other varieties (20, 29, 44).

443

444 We also report evidence in a multinational FEP sample of an association between  
445 lifetime cannabis use and fewer negative symptoms, the latter often considered as a  
446 marker of greater neurodevelopmental impairment in psychotic subjects. Indeed, our  
447 findings are consistent with the hypothesis that psychotic disorders could differ in  
448 their degree of neurodevelopmental impairment, thus being characterized, for  
449 example, by less neurodevelopmental features when associated with cannabis use  
450 (45). Support for this hypothesis is provided by evidence that additional markers  
451 suggestive of neurodevelopmental impairment in psychotic disorders tend to be  
452 uncommon in cannabis-associated psychosis (45).

453 On the other hand, some authors have suggested that people with a psychotic  
454 disorder might use cannabis as an attempt to self-medicate negative symptoms, thus  
455 the observed reduction in negative symptomatology would be an epiphenomenon  
456 due to the cannabis intake itself (16). In principle, this possibility is unlikely since a  
457 prominent negative symptom is reduction of social and instrumental skills, which are  
458 necessary to obtain cannabis and sustain its use over time. Further, our analysis  
459 indicates a lack of a dose-response relationship between cannabis use and the  
460 negative symptom dimension score, suggesting that the difference holds between  
461 those who never tried cannabis and those who may have used it only once. Finally, it  
462 could be argued that psychotic people use cannabis to self-medicate depressive  
463 symptoms, as opposed to negative symptoms. Again, this explanation is not  
464 supported by our study, which differentiates negative and depressive dimensions to  
465 disprove the relationship between depressive symptomatology and cannabis use.

466 Last, we report that the cumulative exposure to cannabis does not impact on  
467 psychotic experiences in controls. One could of course argue that the largest  
468 proportion of subjects with the harmful pattern of cannabis use were patients.  
469 However, further research is needed to look into plausible mechanisms of resilience  
470 to the psychotogenic effect of cannabis as observed in our controls, who report  
471 psychotic experiences if current users but do not seem to accumulate a risk over life  
472 time cannabis use and develop psychotic disorders. Indeed, future studies should



473 aim to investigate if and how genetic factors, plausibly regulating the dopamine  
474 system, interact with cannabis use in shaping the quality of symptomatology.

475

### 476 **Implications**

477 In this multinational study, we show that the pattern of use of cannabis explains part  
478 of the heterogeneity in positive and negative symptom dimensions at first episode  
479 psychosis. Further research should aim to determine biological mechanisms  
480 underlying how cannabis impacts on different clinical manifestations of psychosis.  
481 Meanwhile, translating current findings into clinical practice, symptom dimensions  
482 are useful to stratify patients and develop and implement secondary and tertiary  
483 prevention schemes for cannabis-associated psychosis. Treatment plans should  
484 integrate harm reduction and cannabis use cessation strategies, combined with  
485 possibly better tailored treatment strategies such as the adjunct to conventional  
486 pharmacological treatment of cannabidiol (40).

487

488

### 489 **Acknowledgment**

490 The authors have no conflicts of interest to declare in relation to the work presented  
491 in this paper.

492 The EU-GEI Project is funded by the European Community's Seventh Framework  
493 Programme under grant agreement No. HEALTH-F2-2010-241909 (Project EU-  
494 GEI). The Brazilian study was funded by the São Paulo Research Foundation under  
495 grant number 2012/0417-0. The work was further supported by: Clinician Scientist  
496 Medical Research Council fellowship (project reference MR/M008436/1) to MDF;  
497 Veni grant from the Netherlands Organisation for Scientific Research (grant no. 451-  
498 13-022) to UR. Funders were not involved in design and conduct of the study;  
499 collection, management, analysis and interpretation of the data; preparation, review  
500 or approval of the manuscript, and decision to submit the manuscript for  
501 publication.

502 This paper represents independent research part-funded by the National Institute for  
503 Health Research (NIHR) Biomedical Research Centre at South London and  
504 Maudsley NHS Foundation Trust and King's College London. The views expressed  
505 are those of the author(s) and not necessarily those of the NHS, the NIHR or the  
506 Department of Health and Social Care.

507 **\*EU-GEI authors**

508 Hannah E Jongsma; Domenico Berardi; Lieuwe de Haan; Eva Velthorst; Michael C  
509 O'Donovan; Alexander L Richards; Andrei Szöke; Celso Arango; Antonio Lasalvia;  
510 Andrea Tortelli; Pierre-Michel Llorca; Julio Bobes; Miguel Bernardo; Julio Sanjuán;  
511 Jose Luis Santos; Manuel Arrojo; Cristina Marta Del-Ben; Paulo Rossi Menezes;  
512 Jean-Paul Selten; Kathryn Hubbard<sup>1</sup>, Stephanie Beards<sup>1</sup>, Simona A. Stilo<sup>2</sup>, Mara  
513 Parellada<sup>3</sup>, Pedro Cuadrado<sup>4</sup>, José Juan Rodríguez Solano<sup>5</sup>, Angel Carracedo<sup>6</sup>,  
514 Enrique García Bernardo<sup>7</sup>, Laura Roldán<sup>3</sup>, Gonzalo López<sup>3</sup>, Bibiana Cabrera<sup>8</sup>, Esther  
515 Lorente-Rovira<sup>9</sup>, Paz Garcia-Portilla<sup>10</sup>, Javier Costas<sup>6</sup>, Estela Jiménez-López<sup>11</sup>, Mario  
516 Matteis<sup>3</sup>, Marta Rapado<sup>3</sup>, Emiliano González<sup>3</sup>, Covadonga Martínez<sup>3</sup>, Emilio  
517 Sánchez<sup>7</sup>, M<sup>a</sup> Soledad Olmeda<sup>7</sup>, Nathalie Franke<sup>12</sup>, Fabian Termorshuizen<sup>13,14</sup>,  
518 Daniella van Dam<sup>12</sup>, Elsje van der Ven<sup>13,14</sup>, Elles Messchaart<sup>14</sup>, Marion  
519 Leboyer<sup>15,16,17,18</sup>, Franck Schürhoff<sup>15,16,17,18</sup>, Stéphane Jamain<sup>16,17,18</sup>, Grégoire  
520 Baudin<sup>15,16</sup>, Aziz Ferchiou<sup>15,16</sup>, Baptiste Pignon<sup>15,16,18</sup>, Jean-Romain Richard<sup>16,18</sup>,  
521 Thomas Charpeaud<sup>18,19,21</sup>, Anne-Marie Tronche<sup>18,19,21</sup>, Flora Frijda<sup>22</sup>, Daniele La  
522 Barbera<sup>22,23</sup>, Giovanna Marrazzo<sup>23</sup>, Lucia Sideli<sup>22</sup>, Crocettarachele Sartorio<sup>22,23</sup>, Fabio  
523 Seminerio<sup>22</sup>, Camila Marcelino Loureiro<sup>24,25</sup>, Rosana Shuhama<sup>24,25</sup>, Mirella  
524 Ruggeri<sup>26</sup>, Sarah Tosato<sup>26</sup>, Chiara Bonetto<sup>26</sup>, Doriana Cristofalo<sup>26</sup>

### 525 **EU-GEI group authorship affiliations**

526 <sup>1</sup> Department of Health Service and Population Research, Institute of Psychiatry,  
527 King's College London, De Crespigny Park, Denmark Hill, London, United Kingdom,  
528 SE5 8AF

529 <sup>2</sup> Department of Psychosis Studies, Institute of Psychiatry, King's College London, De  
530 Crespigny Park, Denmark Hill, London, United Kingdom SE5 8AF

531 <sup>3</sup> Department of Child and Adolescent Psychiatry, Hospital General Universitario  
532 Gregorio Marañón, School of Medicine, Universidad Complutense, IiSGM  
533 (CIBERSAM), C/Doctor Esquerdo 46, 28007 Madrid, Spain

534 <sup>4</sup> Villa de Vallecas Mental Health Department, Villa de Vallecas Mental Health  
535 Centre, Hospital Universitario Infanta Leonor / Hospital Virgen de la Torre, C/San  
536 Claudio 154, 28038 Madrid, Spain

537 <sup>5</sup> Puente de Vallecas Mental Health Department, Hospital Universitario Infanta  
538 Leonor / Hospital Virgen de la Torre, Centro de Salud Mental Puente de Vallecas,  
539 C/Peña Gorbea 4, 28018 Madrid, Spain

540 <sup>6</sup> Fundación Pública Galega de Medicina Xenómica, Hospital Clínico Universitario,  
541 Choupana s/n, 15782 Santiago de Compostela, Spain

- 542 <sup>7</sup> Department of Psychiatry, Hospital General Universitario Gregorio Marañón,  
543 School of Medicine, Universidad Complutense, IiSGM (CIBERSAM), C/Doctor  
544 Esquerdo 46, 28007 Madrid, Spain
- 545 <sup>8</sup> Department of Psychiatry, Hospital Clinic, IDIBAPS, Centro de Investigación  
546 Biomédica en Red de Salud Mental (CIBERSAM), Universidad de Barcelona,  
547 C/Villarroel 170, escalera 9, planta 6, 08036 Barcelona, Spain
- 548 <sup>9</sup> Department of Psychiatry, School of Medicine, Universidad de Valencia, Centro de  
549 Investigación Biomédica en Red de Salud Mental (CIBERSAM), C/Avda. Blasco  
550 Ibáñez 15, 46010 Valencia, Spain
- 551 <sup>10</sup> Department of Medicine, Psychiatry Area, School of Medicine, Universidad de  
552 Oviedo, Centro de Investigación Biomédica en Red de Salud Mental (CIBERSAM),  
553 C/Julián Clavería s/n, 33006 Oviedo, Spain
- 554 <sup>11</sup> Department of Psychiatry, Servicio de Psiquiatría Hospital “Virgen de la Luz”,  
555 C/Hermanidad de Donantes de Sangre, 16002 Cuenca, Spain
- 556 <sup>12</sup> Department of Psychiatry, Early Psychosis Section, Academic Medical Centre,  
557 University of Amsterdam, Meibergdreef 5, 1105 AZ Amsterdam, The Netherlands
- 558 <sup>13</sup> Rivierduinen Centre for Mental Health, Leiden, Sandifortdreef 19, 2333 ZZ Leiden,  
559 The Netherlands
- 560 <sup>14</sup> Department of Psychiatry and Neuropsychology, School for Mental Health and  
561 Neuroscience, South Limburg Mental Health Research and Teaching Network,  
562 Maastricht University Medical Centre, P.O. Box 616, 6200 MD Maastricht, The  
563 Netherlands
- 564 <sup>15</sup> AP-HP, Groupe Hospitalier “Mondor”, Pôle de Psychiatrie, 51 Avenue de Maréchal  
565 de Lattre de Tassigny, 94010 Créteil, France
- 566 <sup>16</sup> INSERM, U955, Equipe 15, 51 Avenue de Maréchal de Lattre de Tassigny, 94010  
567 Créteil, France
- 568 <sup>17</sup> Faculté de Médecine, Université Paris-Est, 51 Avenue de Maréchal de Lattre de  
569 Tassigny, 94010 Créteil, France
- 570 <sup>18</sup> Fondation Fondamental, 40 Rue de Mesly, 94000 Créteil, France
- 571 <sup>19</sup> CMP B CHU, BP 69, 63003 Clermont Ferrand, Cedex 1, France
- 572 <sup>20</sup> EPS Maison Blanche, Paris 75020 France
- 573 <sup>21</sup> Université Clermont Auvergne, EA 7280, Clermont-Ferrand, 63000, France
- 574 <sup>22</sup> Department of Experimental Biomedicine and Clinical Neuroscience, Section of  
575 Psychiatry, University of Palermo, Via G. La Loggia n.1, 90129 Palermo, Italy

576 <sup>23</sup> Unit of Psychiatry, “P. Giaccone” General Hospital, Via G. La Loggia n.1, 90129  
577 Palermo, Italy

578 <sup>24</sup> Departamento de Neurociências e Ciências do Comportamento, Faculdade de  
579 Medicina de Ribeirão Preto, Universidade de São Paulo, Av. Bandeirantes, 3900 -  
580 Monte Alegre- CEP 14049-900, Ribeirão Preto, SP, Brasil

581 <sup>25</sup> Núcleo de Pesquisa em Saúde Mental Populacional, Universidade de São Paulo,  
582 Avenida Doutor Arnaldo 455, CEP 01246-903, SP, Brasil

583 <sup>26</sup> Section of Psychiatry, Department of Neuroscience, Biomedicine and Movement,  
584 University of Verona, Piazzale L.A. Scuro 10, 37134 Verona, Italy

585

586

## 587 **References**

- 588 1. Marconi A, Di Forti M, Lewis CM, et al. Meta-analysis of the Association Between  
589 the Level of Cannabis Use and Risk of Psychosis. *Schizophrenia bulletin*.  
590 2016;42:1262-1269.
- 591 2. Walter Bromberg. MARIHUANA INTOXICATION. *American Journal of*  
592 *Psychiatry*. 1934;91:303-330.
- 593 3. Chopra GS, Smith JW. Psychotic reactions following cannabis use in east indians.  
594 *Archives of General Psychiatry*. 1974;30:24-27.
- 595 4. Talbott JA, Teague JW. Marihuana psychosis. Acute toxic psychosis associated  
596 with the use of Cannabis derivatives. *Jama*. 1969;210:299-302.
- 597 5. Spencer DJ. Cannabis-Induced Psychosis. *International Journal of the Addictions*.  
598 1971;6:323-326.
- 599 6. Negrete JC, Knapp WP, Douglas DE, et al. Cannabis affects the severity of  
600 schizophrenic symptoms: results of a clinical survey. *Psychological medicine*.  
601 1986;16:515-520.
- 602 7. Grech A, Van Os J, Jones PB, et al. Cannabis use and outcome of recent onset  
603 psychosis. *European psychiatry : the journal of the Association of European*  
604 *Psychiatrists*. 2005;20:349-353.
- 605 8. Seddon JL, Birchwood M, Copello A, et al. Cannabis Use Is Associated With  
606 Increased Psychotic Symptoms and Poorer Psychosocial Functioning in First-  
607 Episode Psychosis: A Report From the UK National EDEN Study. *Schizophrenia*  
608 *bulletin*. 2016;42:619-625.
- 609 9. Ringen PA, Nesvag R, Helle S, et al. Premorbid cannabis use is associated with  
610 more symptoms and poorer functioning in schizophrenia spectrum disorder.  
611 *Psychological medicine*. 2016;46:3127-3136.
- 612 10. Addington J, Addington D. Patterns, predictors and impact of substance use in  
613 early psychosis: a longitudinal study. *Acta psychiatrica Scandinavica*. 2007;115:304-  
614 309.
- 615 11. Foti DJ, Kotov R, Guey LT, et al. Cannabis use and the course of schizophrenia:  
616 10-year follow-up after first hospitalization. *The American journal of psychiatry*.  
617 2010;167:987-993.
- 618 12. Thornicroft G, Meadows G, Politi P. Is "cannabis psychosis" a distinct category?  
619 *European Psychiatry*. 1992;7:277-282.

- 620 13. Boydell J, Dean K, Dutta R, et al. A comparison of symptoms and family history  
621 in schizophrenia with and without prior cannabis use: implications for the concept of  
622 cannabis psychosis. *Schizophr Res.* 2007;93:203-210.
- 623 14. van Dijk D, Koeter MW, Hijman R, et al. Effect of cannabis use on the course of  
624 schizophrenia in male patients: a prospective cohort study. *Schizophr Res.*  
625 2012;137:50-57.
- 626 15. Barrowclough C, Gregg L, Lobban F, et al. The impact of cannabis use on clinical  
627 outcomes in recent onset psychosis. *Schizophrenia bulletin.* 2015;41:382-390.
- 628 16. Peralta V, Cuesta MJ. Influence of cannabis abuse on schizophrenic  
629 psychopathology. *Acta psychiatrica Scandinavica.* 1992;85:127-130.
- 630 17. Bersani G, Orlandi V, Kotzalidis GD, et al. Cannabis and schizophrenia: impact  
631 on onset, course, psychopathology and outcomes. *Eur Arch Psychiatry Clin Neurosci.*  
632 2002;252:86-92.
- 633 18. Zammit S, Moore TH, Lingford-Hughes A, et al. Effects of cannabis use on  
634 outcomes of psychotic disorders: systematic review. *The British journal of psychiatry*  
635 : the journal of mental science. 2008;193:357-363.
- 636 19. Di Forti M, Marconi A, Carra E, et al. Proportion of patients in south London  
637 with first-episode psychosis attributable to use of high potency cannabis: a case-  
638 control study. *The Lancet Psychiatry.* 2015;2:233-238.
- 639 20. Freeman TP, van der Pol P, Kuijpers W, et al. Changes in cannabis potency and  
640 first-time admissions to drug treatment: a 16-year study in the Netherlands.  
641 *Psychological medicine.* 2018:1-7.
- 642 21. ElSohly MA, Mehmedic Z, Foster S, et al. Changes in Cannabis Potency Over the  
643 Last 2 Decades (1995-2014): Analysis of Current Data in the United States. *Biological*  
644 *psychiatry.* 2016;79:613-619.
- 645 22. Potter DJ, Hammond K, Tuffnell S, et al. Potency of Delta(9) -  
646 tetrahydrocannabinol and other cannabinoids in cannabis in England in 2016:  
647 Implications for public health and pharmacology. *Drug testing and analysis.*  
648 2018;10:628-635.
- 649 23. Quattrone D, Di Forti M, Gayer-Anderson C, et al. Transdiagnostic dimensions  
650 of psychopathology at first episode psychosis: findings from the multinational EU-  
651 GEI study. *Psychological medicine.* 2018:1-14.
- 652 24. Ragazzi TCC, Shuhama R, Menezes PR, et al. Cannabis use as a risk factor for  
653 psychotic-like experiences: A systematic review of non-clinical populations evaluated  
654 with the Community Assessment of Psychic Experiences. *Early intervention in*  
655 *psychiatry.* 2018;0.
- 656 25. Jongsma HE, Gayer-Anderson C, Lasalvia A, et al. Treated Incidence of  
657 Psychotic Disorders in the Multinational EU-GEI Study. *JAMA Psychiatry.*  
658 2018;75:36-46.
- 659 26. Mallett R. Sociodemographic schedule. Section of Social Psychiatry, Institute of  
660 Psychiatry. 1997;183.
- 661 27. McGuffin P, Farmer A, Harvey I. A polydiagnostic application of operational  
662 criteria in studies of psychotic illness. Development and reliability of the OPCRIT  
663 system. *Archives of general psychiatry.* 1991;48:764-770.
- 664 28. Stefanis NC, Hanssen M, Smirnis NK, et al. Evidence that three dimensions of  
665 psychosis have a distribution in the general population. *Psychological medicine.*  
666 2002;32:347-358.
- 667 29. Di Forti M, Morgan C, Dazzan P, et al. High-potency cannabis and the risk of  
668 psychosis. *The British journal of psychiatry : the journal of mental science.*  
669 2009;195:488-491.

- 670 30. Quattrone D, Di Forti M, Gayer-Anderson C, et al. Transdiagnostic dimensions  
671 of psychopathology at first episode psychosis: findings from the multinational EU-  
672 GEI study. *Psychological medicine*. 2018.
- 673 31. EMCDDA I: European drug report 2016: trends and developments. European  
674 Monitoring Centre for Drugs and Drug Addiction Lisbon; 2013.
- 675 32. Di Forti M, Quattrone D, Freeman TP, et al. The Contribution of Cannabis Use to  
676 Variation in the Incidence of Psychotic Disorder across Europe: the EUGEI case-  
677 control study (accepted for publication). Submitted. 2018.
- 678 33. Muthén L, Muthén B: Mplus user's guide (Seventh Edition). Los Angeles, CA,  
679 Muthén & Muthén; 2012.
- 680 34. Rodriguez A, Reise SP, Haviland MG. Applying Bifactor Statistical Indices in the  
681 Evaluation of Psychological Measures. *Journal of personality assessment*.  
682 2016;98:223-237.
- 683 35. Hancock GR, Mueller RO: Rethinking construct reliability within latent variable  
684 systems. in *Structural Equation Modeling: Present and Future : a Festschrift in*  
685 *Honor of Karl Jöreskog*. Edited by Cudek R, Du Toit S, Sorbom D. Lincolnwood, IL,  
686 Scientific Software International, Inc.; 2001. pp. 195-216.
- 687 36. Taylor M, Sullivan J, Ring SM, et al. Assessment of rates of recanting and hair  
688 testing as a biological measure of drug use in a general population sample of young  
689 people. *Addiction*. 2017;112:477-485.
- 690 37. Freeman TP, Morgan CJ, Hindocha C, et al. Just say 'know': how do cannabinoid  
691 concentrations influence users' estimates of cannabis potency and the amount they  
692 roll in joints? *Addiction*. 2014;109:1686-1694.
- 693 38. Wolford GL, Rosenberg SD, Drake RE, et al. Evaluation of methods for detecting  
694 substance use disorder in persons with severe mental illness. *Psychology of Addictive*  
695 *Behaviors*. 1999;13:313-326.
- 696 39. Schubart CD, Sommer IE, van Gastel WA, et al. Cannabis with high cannabidiol  
697 content is associated with fewer psychotic experiences. *Schizophr Res*. 2011;130:216-  
698 221.
- 699 40. McGuire P, Robson P, Cubala WJ, et al. Cannabidiol (CBD) as an Adjunctive  
700 Therapy in Schizophrenia: A Multicenter Randomized Controlled Trial. *The*  
701 *American journal of psychiatry*. 2018;175:225-231.
- 702 41. Kendler KS, Gallagher TJ, Abelson JM, et al. Lifetime prevalence, demographic  
703 risk factors, and diagnostic validity of nonaffective psychosis as assessed in a US  
704 community sample. The National Comorbidity Survey. *Arch Gen Psychiatry*.  
705 1996;53:1022-1031.
- 706 42. Hanssen M, Bak M, Bijl R, et al. The incidence and outcome of subclinical  
707 psychotic experiences in the general population. *The British journal of clinical*  
708 *psychology*. 2005;44:181-191.
- 709 43. Schoeler T, Petros N, Di Forti M, et al. Effects of continuation, frequency, and  
710 type of cannabis use on relapse in the first 2 years after onset of psychosis: an  
711 observational study. *The Lancet Psychiatry*. 2016;3:947-953.
- 712 44. Morrison P, Zois V, McKeown D, et al. The acute effects of synthetic intravenous  
713  $\Delta^9$ -tetrahydrocannabinol on psychosis, mood and cognitive functioning.  
714 *Psychological medicine*. 2009;39:1607-1616.
- 715 45. Murray RM, Englund A, Abi-Dargham A, et al. Cannabis-associated psychosis:  
716 Neural substrate and clinical impact. *Neuropharmacology*. 2017;124:89-104.
- 717
